# Supplementary material for: Aptamer-Based Sensor for Rapid and Sensitive Detection of Ofloxacin in Meat Products
Source: MDPI journal article supplement (doi:10.3390/s24061740), 2024-03-07
Supplement: s1 [file s1]

**Highlights:**

1. Aptamer-based sensor was developed for rapid on-site detection of ofloxacin.
2. Limit of detection of sensor was 0.61 nM of ofloxacin.
3. A fluorescent sensor designed for ofloxacin;
4. Direct detection of ofloxacin without complex pre-treatment.
